# Supplementary material for: (+)-CSA Catalyzed Multicomponent Synthesis of 1-[(1,3-Thiazol-2-ylamino)methyl]-2-naphthols and Their Ring-Closure Reaction under Ultrasonic Irradiation
Source: Hindawi journal article supplement (doi:10.1155/2016/9315614), 2016-01-01

## SUPPLEMENTARY MATERIAL

### **(+)-CSA Catalyzed Multicomponent Synthesis of 1-[(1,3-thiazol-2-ylamino)methyl]-2-naphthols and Their Ring-Closure Reaction Under Ultrasonic Irradiation**

Emel Pelit<sup>1,\*</sup> and Zuhal Turgut<sup>2</sup>

<sup>1</sup>Kirklareli University, Faculty of Art and Sciences, Department of Chemistry, Kayali Campus, 39100, Kirklareli, Turkey

<sup>2</sup>Yildiz Technical University, Faculty of Art and Sciences, Department of Chemistry, Davutpasa Campus, 34210, Istanbul, Turkey  
e-mail: epelit@klu.edu.tr

#### **Table of contents**

|                                                           | Page |
|-----------------------------------------------------------|------|
| Copy of <sup>1</sup> H and ATP NMR spectra of Compound 1b | 2    |
| Copy of <sup>1</sup> H and ATP NMR spectra of Compound 1c | 3    |
| Copy of <sup>1</sup> H and ATP NMR spectra of Compound 1d | 4    |
| Copy of <sup>1</sup> H and ATP NMR spectra of Compound 1e | 5    |
| Copy of <sup>1</sup> H and ATP NMR spectra of Compound 1f | 6    |
| Copy of <sup>1</sup> H and ATP NMR spectra of Compound 1k | 7    |
| Copy of <sup>1</sup> H and ATP NMR spectra of Compound 1m | 8    |
| Copy of <sup>1</sup> H and ATP NMR spectra of Compound 1n | 9    |
| Copy of <sup>1</sup> H and ATP NMR spectra of Compound 2a | 10   |
| Copy of <sup>1</sup> H and ATP NMR spectra of Compound 2b | 11   |
| Copy of <sup>1</sup> H and ATP NMR spectra of Compound 2c | 12   |
| Copy of <sup>1</sup> H and ATP NMR spectra of Compound 2e | 13   |

**Compound 1b:**

**Solvent: DMSO-d<sub>6</sub> – Frequency: 500 MHz**

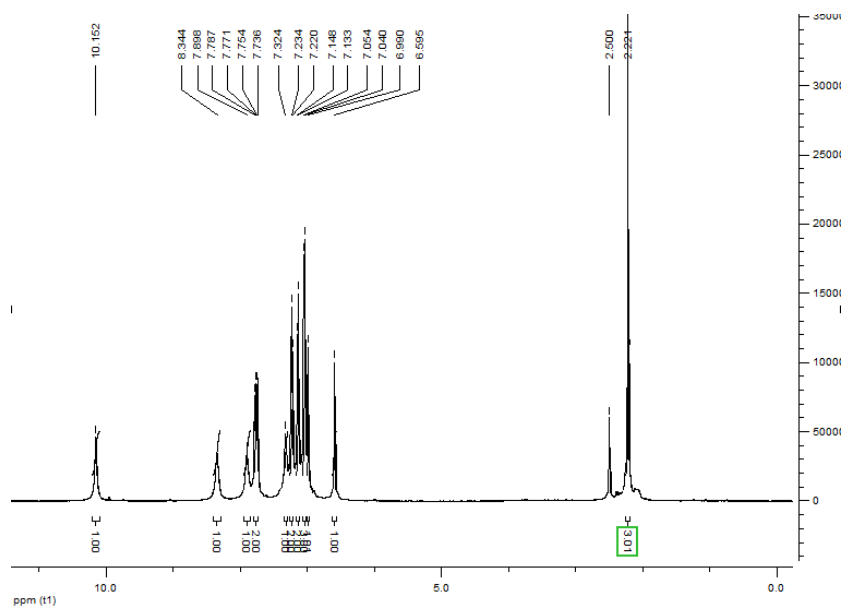

**Solvent: DMSO-d<sub>6</sub> – Frequency: 125 MHz**

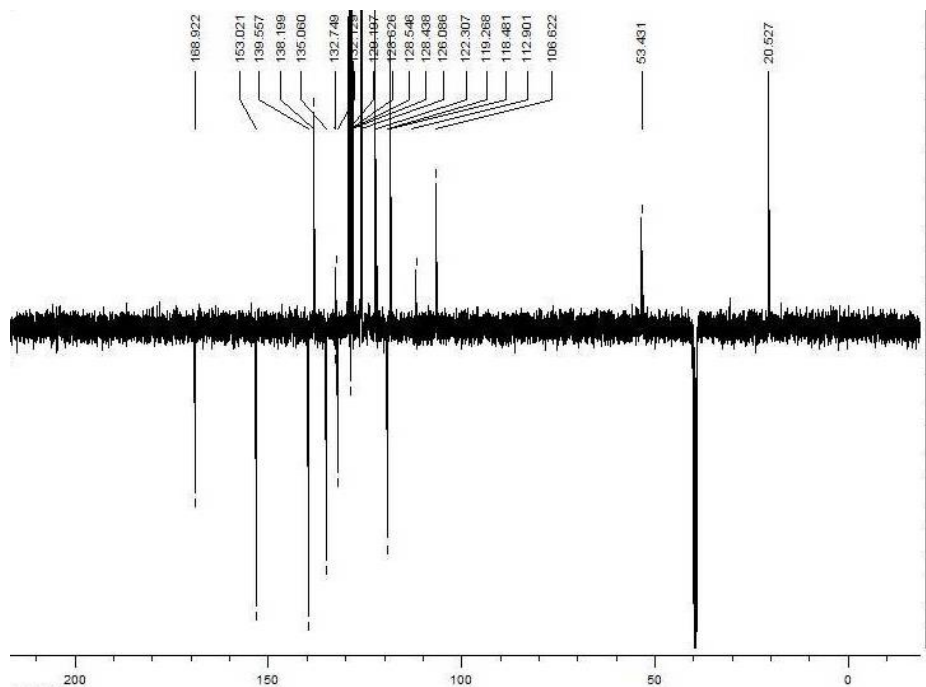

**Compound 1c:**

**Solvent: DMSO-d<sub>6</sub> – Frequency: 500 MHz**

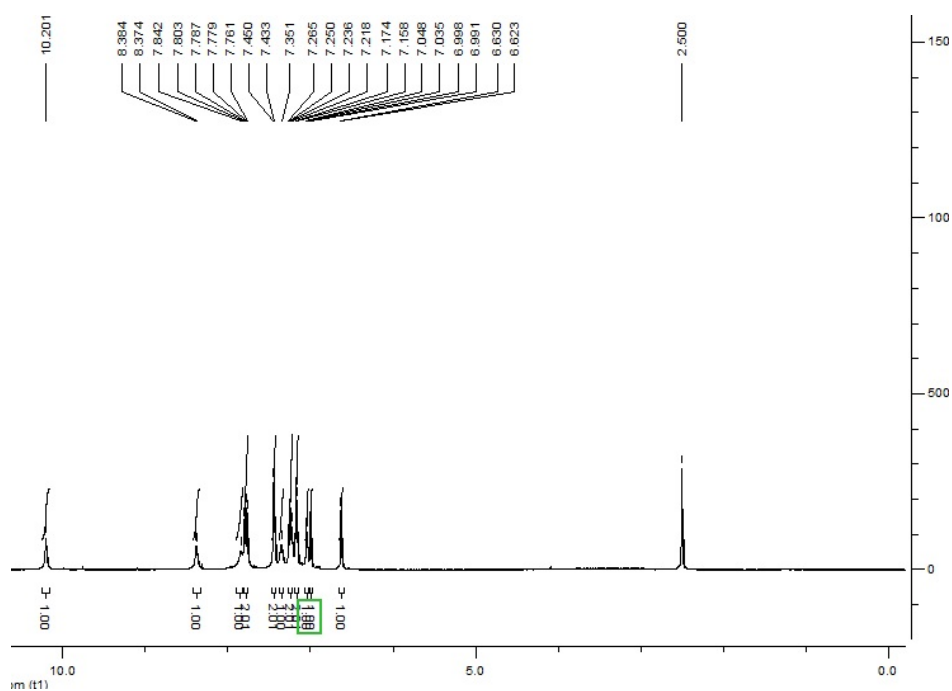

**Solvent: DMSO-d<sub>6</sub>- Frequency: 125 MHz**

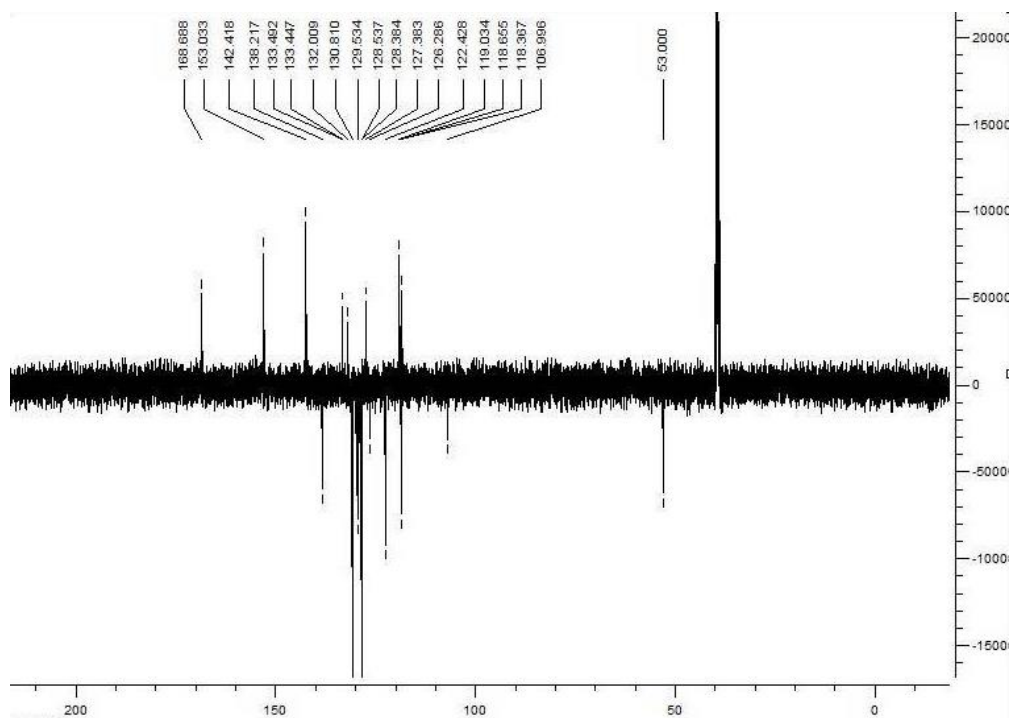

**Compound 1d:**

**Solvent: DMSO-d<sub>6</sub>- Frequency: 500 MHz**

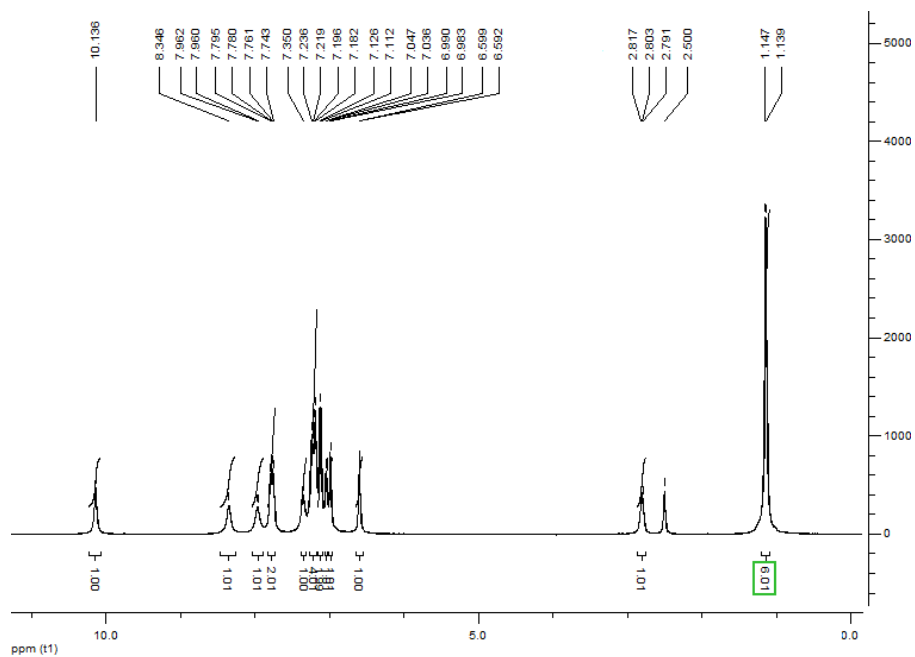

**Solvent: DMSO-d<sub>6</sub>- Frequency: 125 MHz**

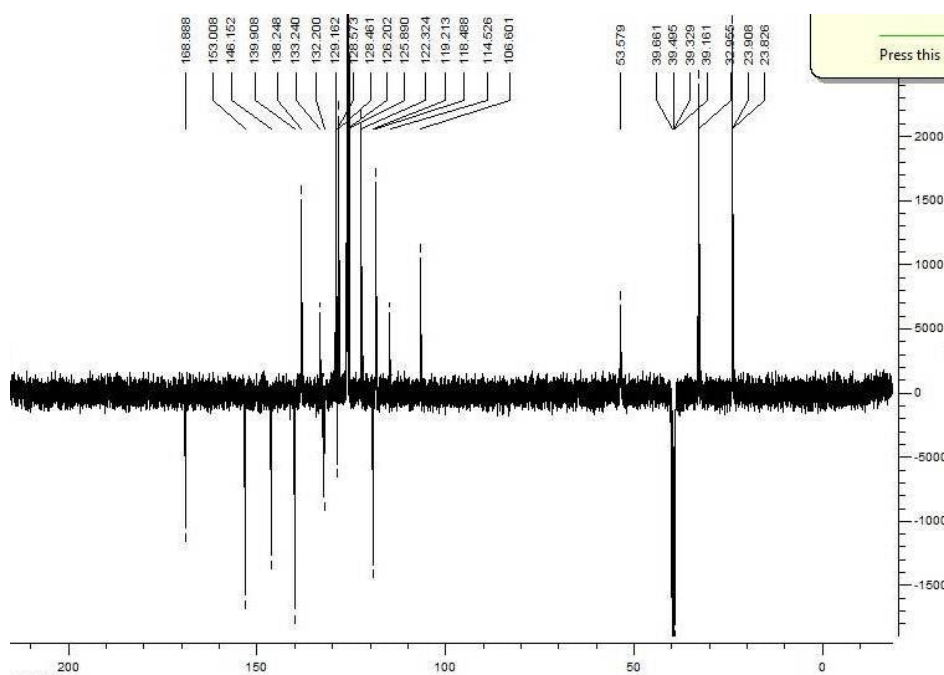

**Compound 1e:**

**Solvent: DMSO-d<sub>6</sub>- Frequency: 500 MHz**

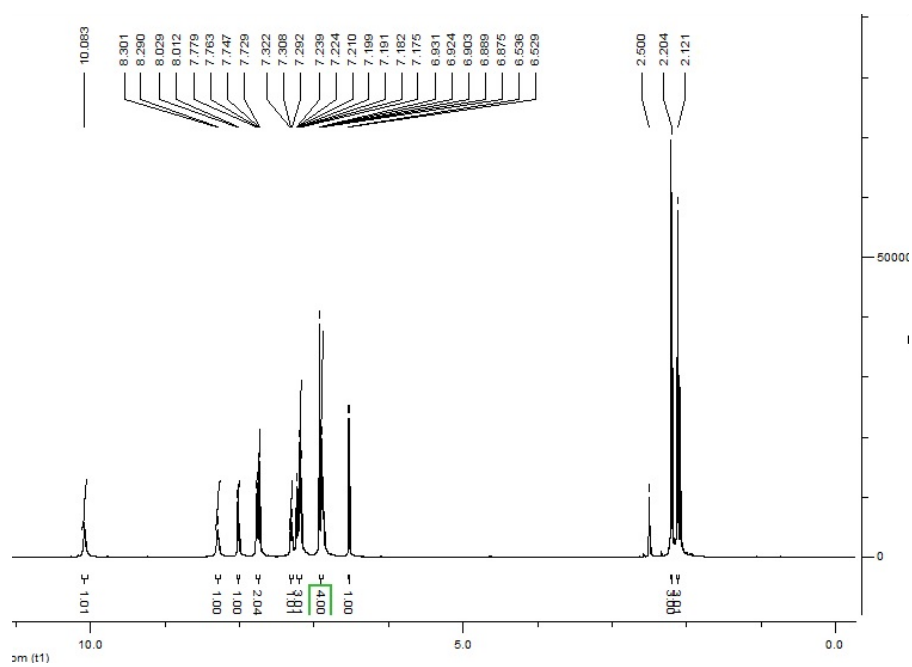

**Solvent: DMSO-d<sub>6</sub>- Frequency: 125 MHz**

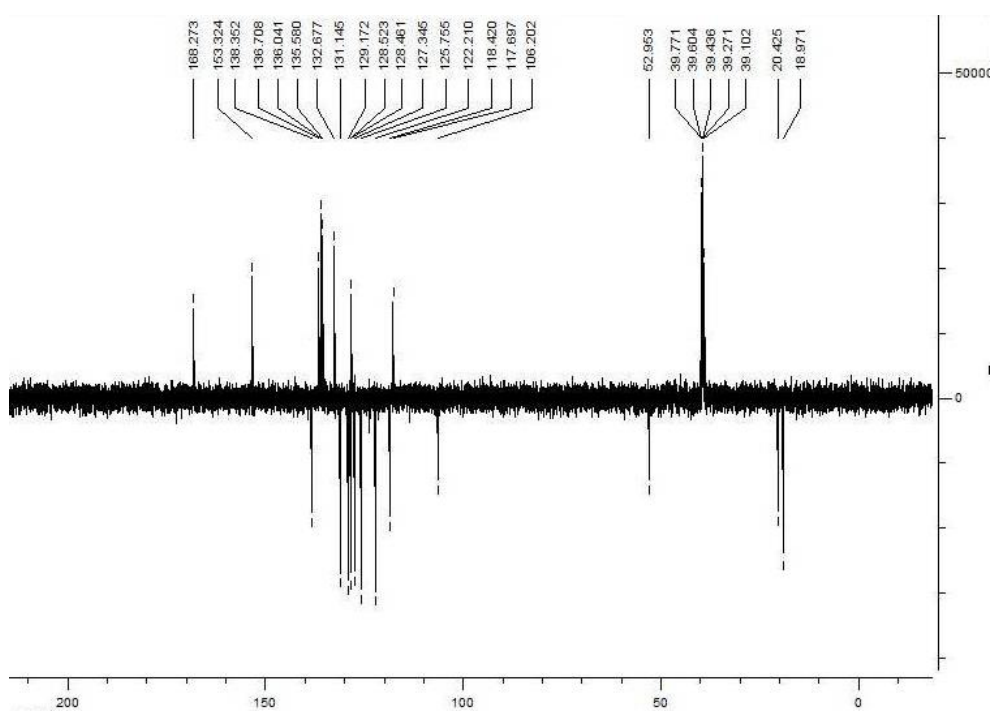

**Compound 1f:**

**Solvent: DMSO-d<sub>6</sub>- Frequency: 500 MHz**

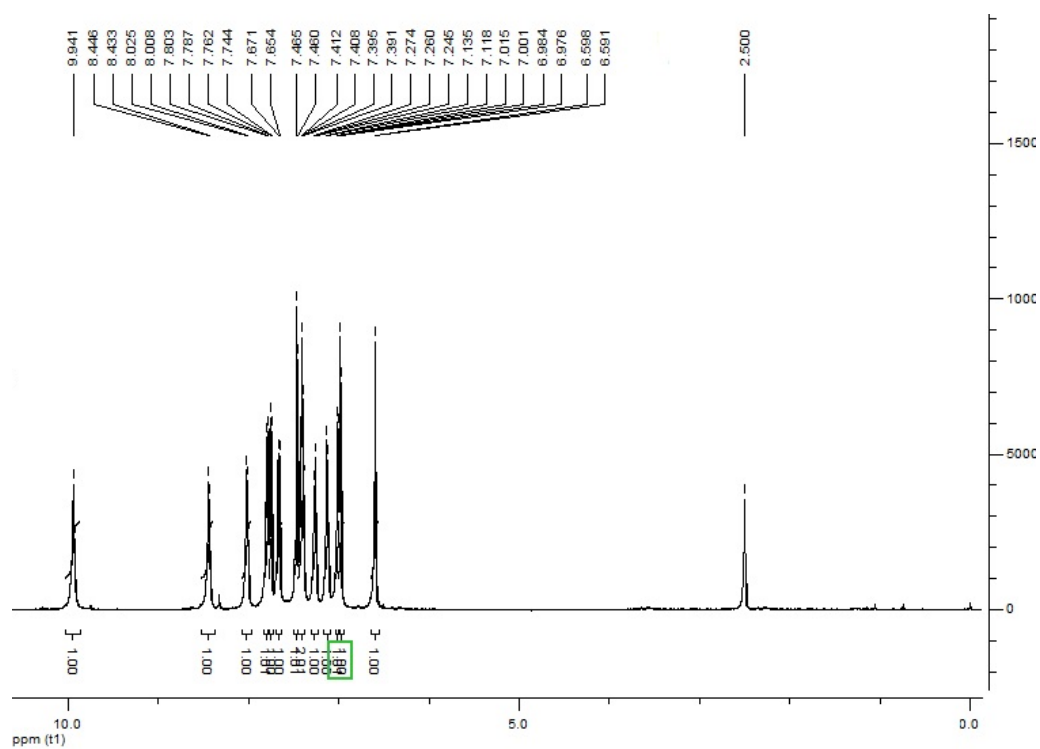

**Solvent: DMSO-d<sub>6</sub>- Frequency: 125 MHz**

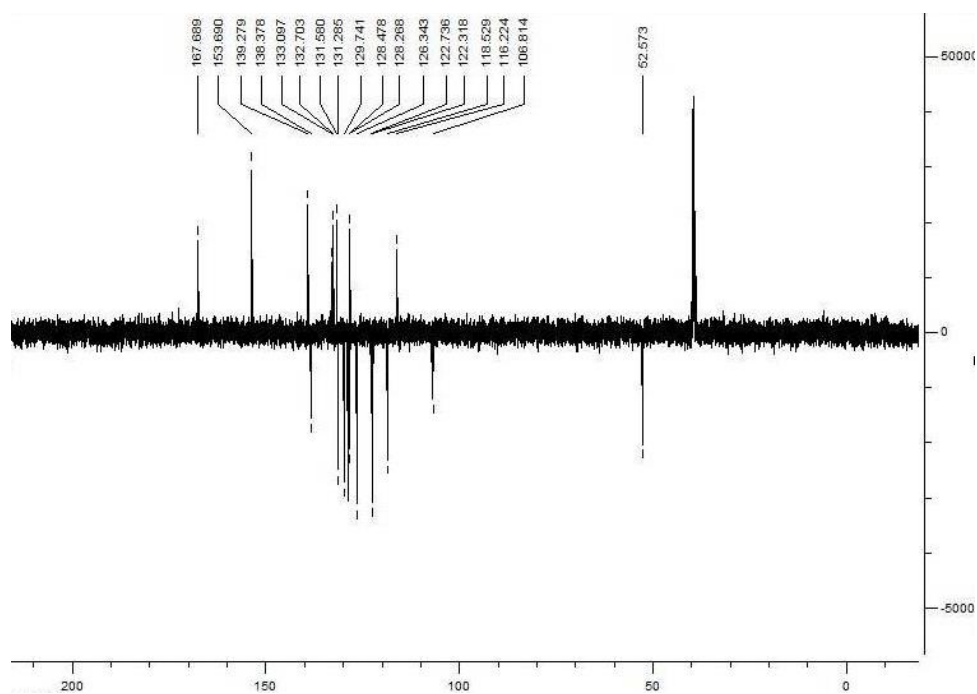

**Compound 1k:**

**Solvent: DMSO-d<sub>6</sub>- Frequency: 500 MHz**

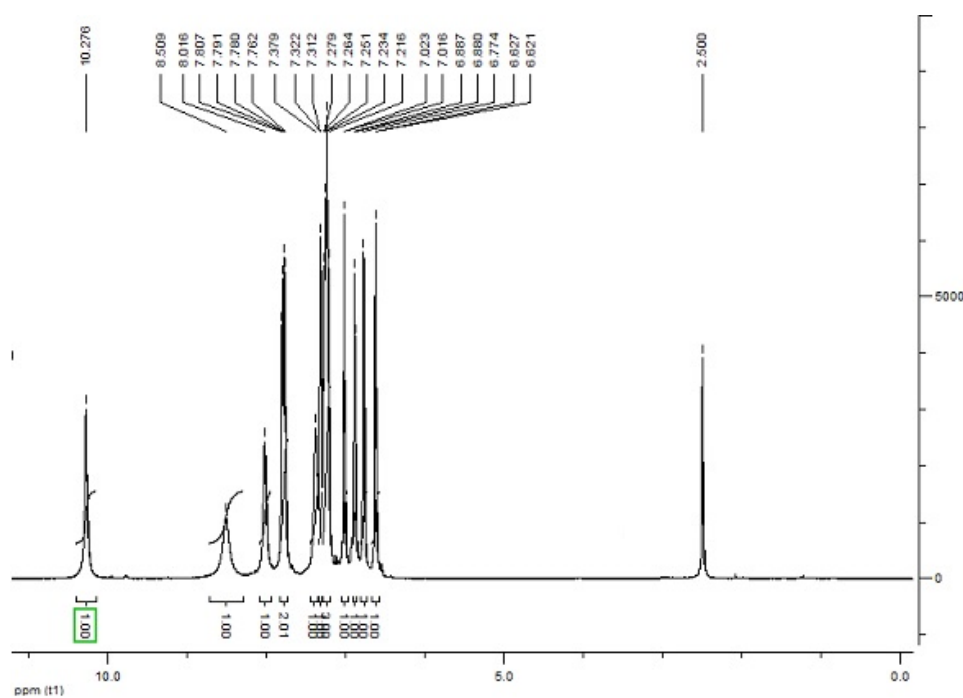

**Solvent: DMSO-d<sub>6</sub>- Frequency: 125 MHz**

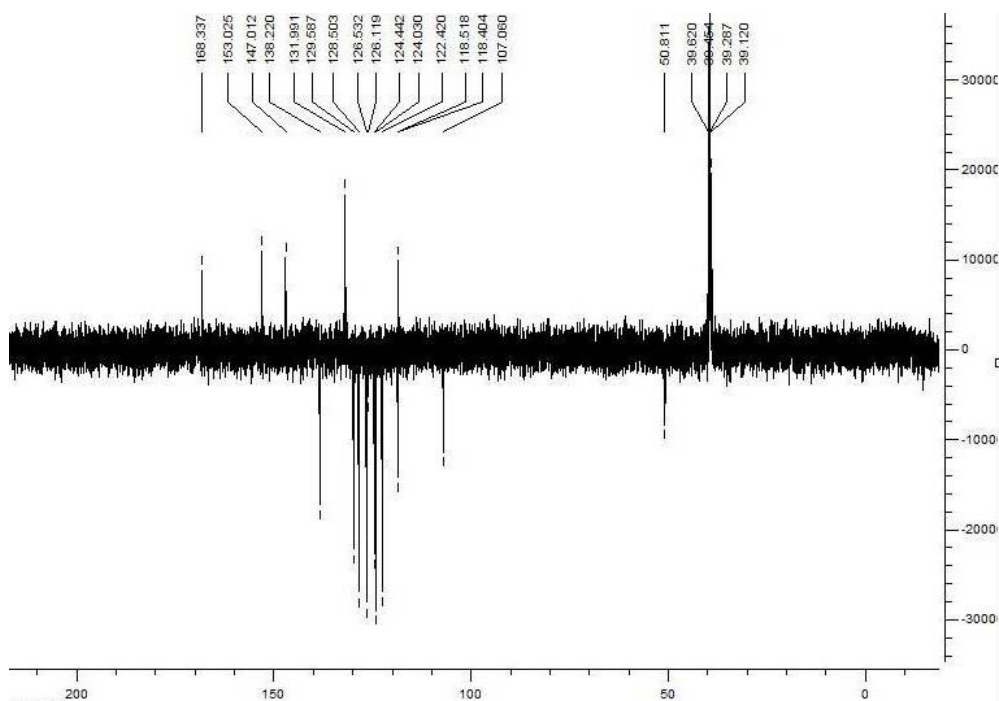

**Compound 1m:**

**Solvent: DMSO-d<sub>6</sub>- Frequency: 500 MHz**

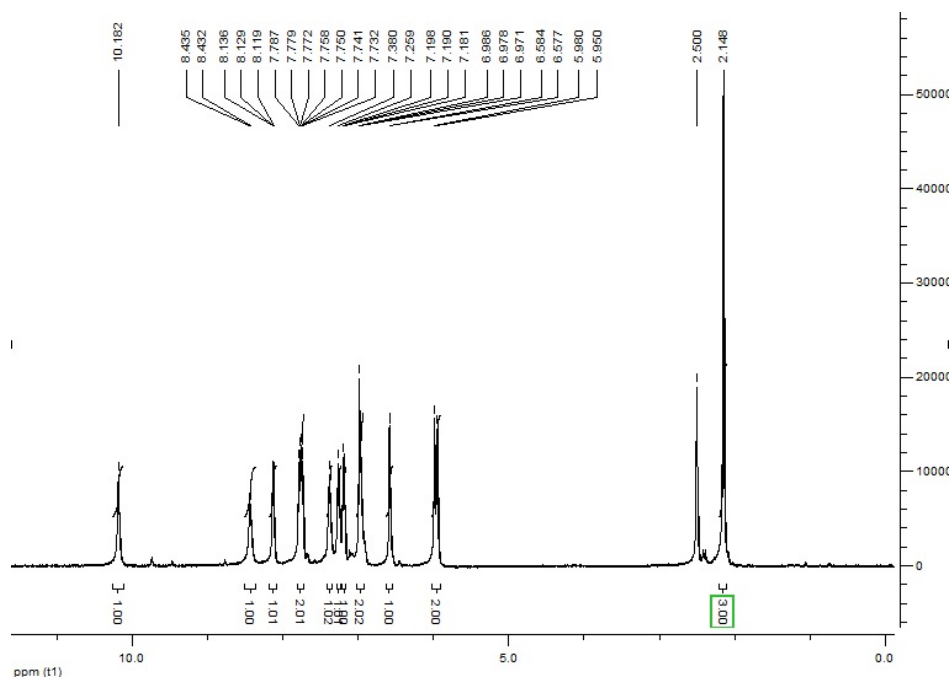

**Solvent: DMSO-d<sub>6</sub>- Frequency: 125 MHz**

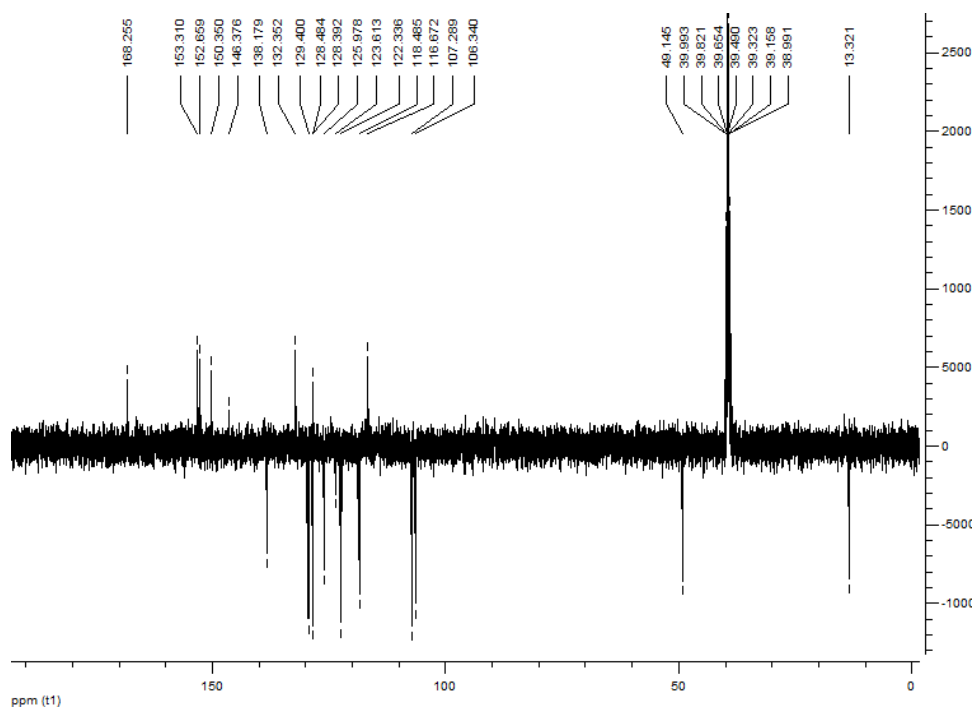

**Compound 1n:**

**Solvent: DMSO-d<sub>6</sub>- Frequency: 500 MHz**

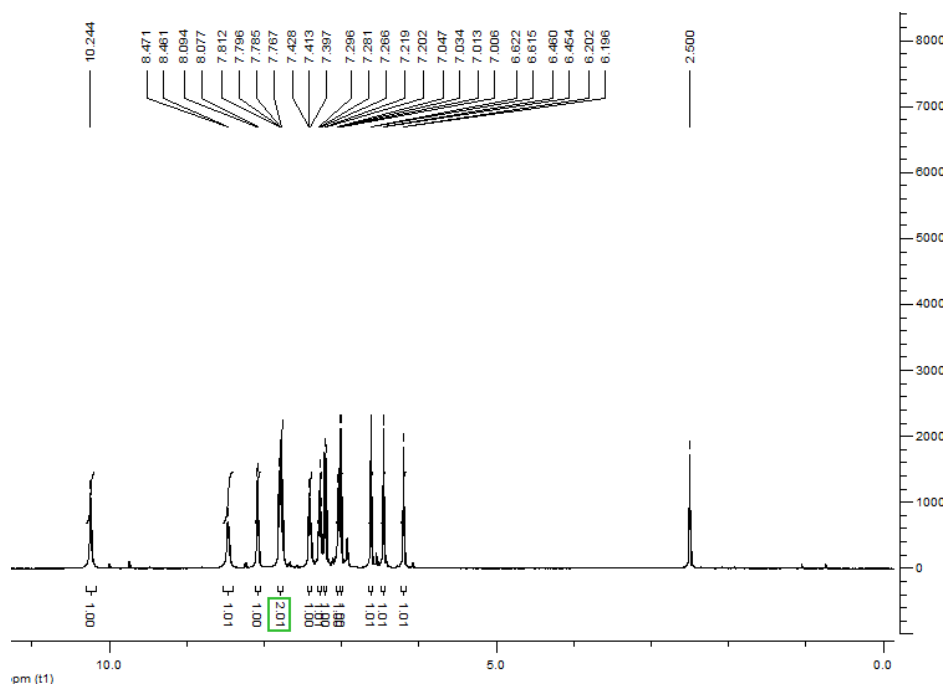

**Solvent: DMSO-d<sub>6</sub>- Frequency: 125 MHz**

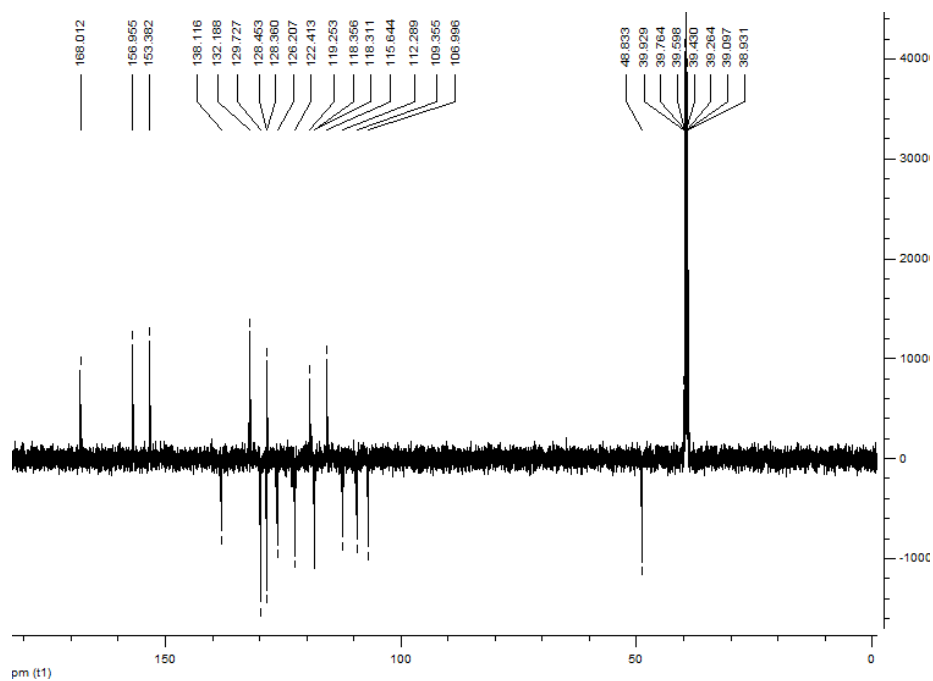

**Compound 2a:**

**Solvent: CDCl<sub>3</sub>- Frequency: 500 MHz**

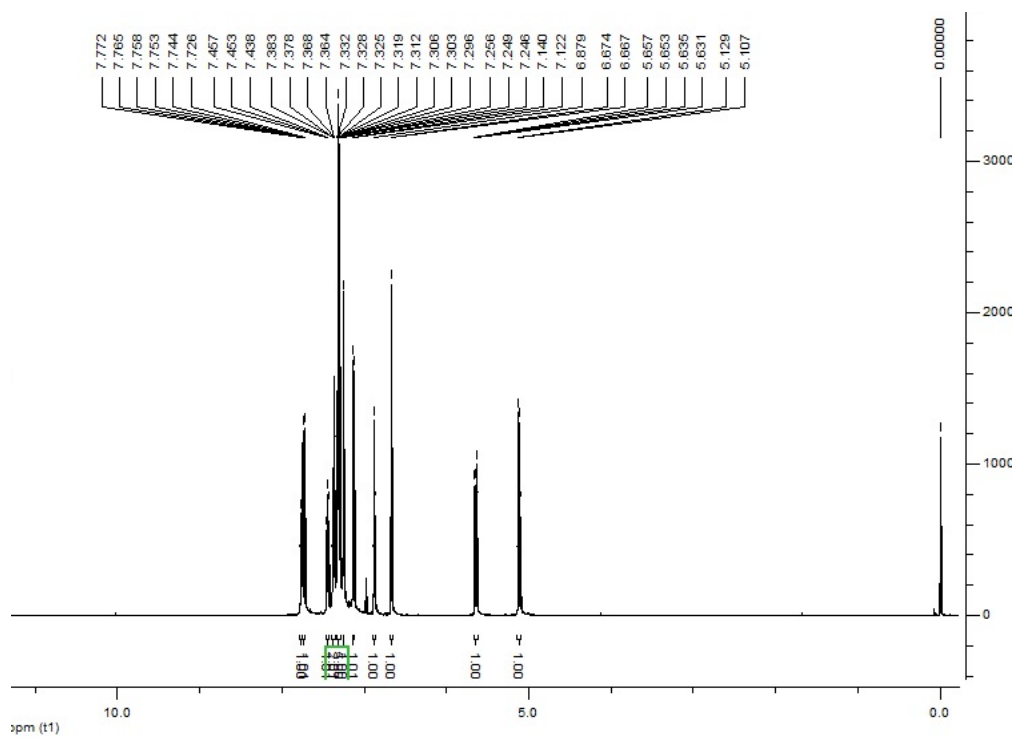

**Solvent: CDCl<sub>3</sub> – Frequency: 125 MHz**

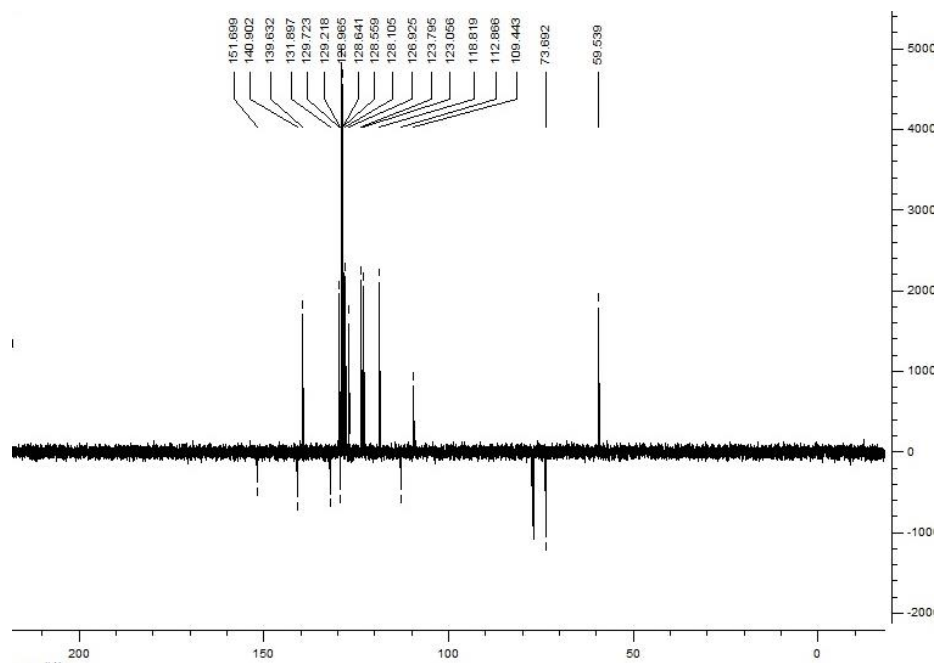

**Compound 2b:**

**Solvent: CDCl<sub>3</sub> – Frequency: 500 MHz**

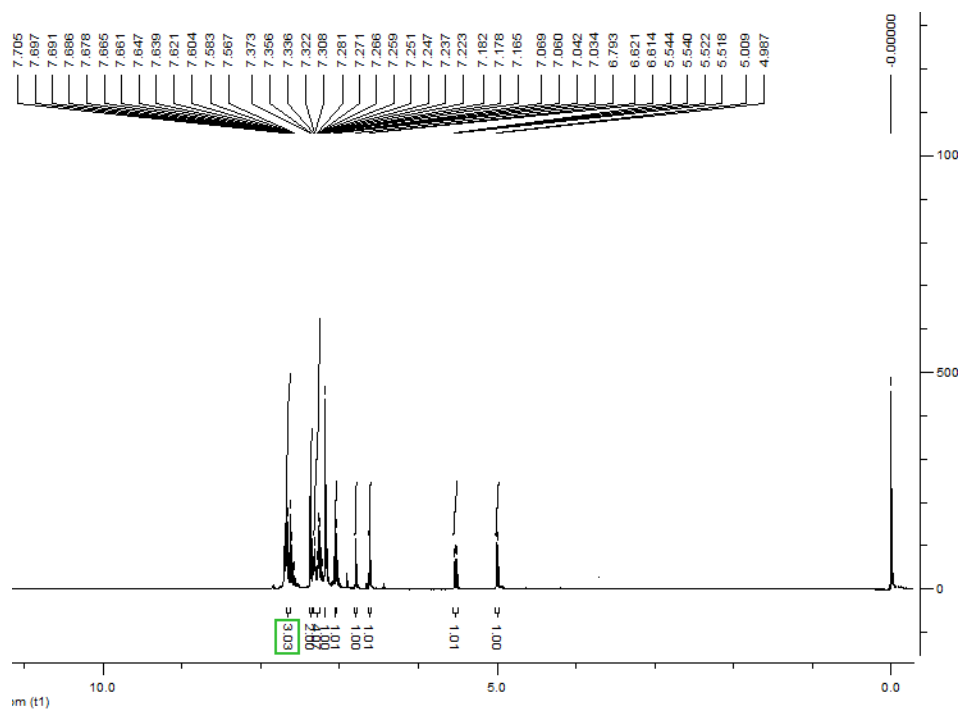

**Solvent: CDCl<sub>3</sub> – Frequency: 125 MHz**

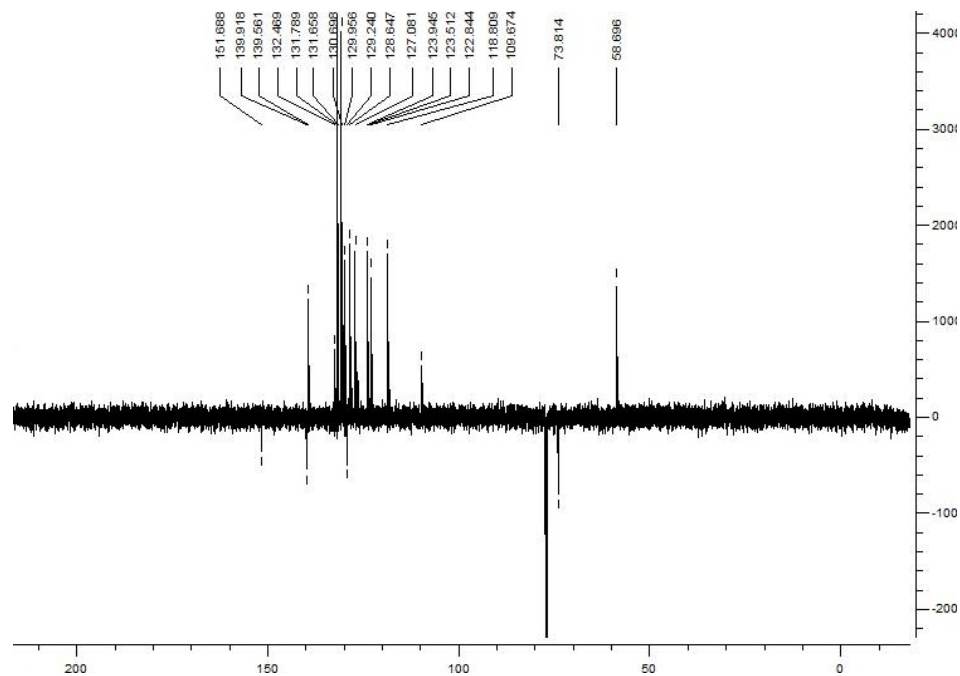

**Compound 2c:**

**Solvent: CDCl<sub>3</sub> – Frequency: 500 MHz**

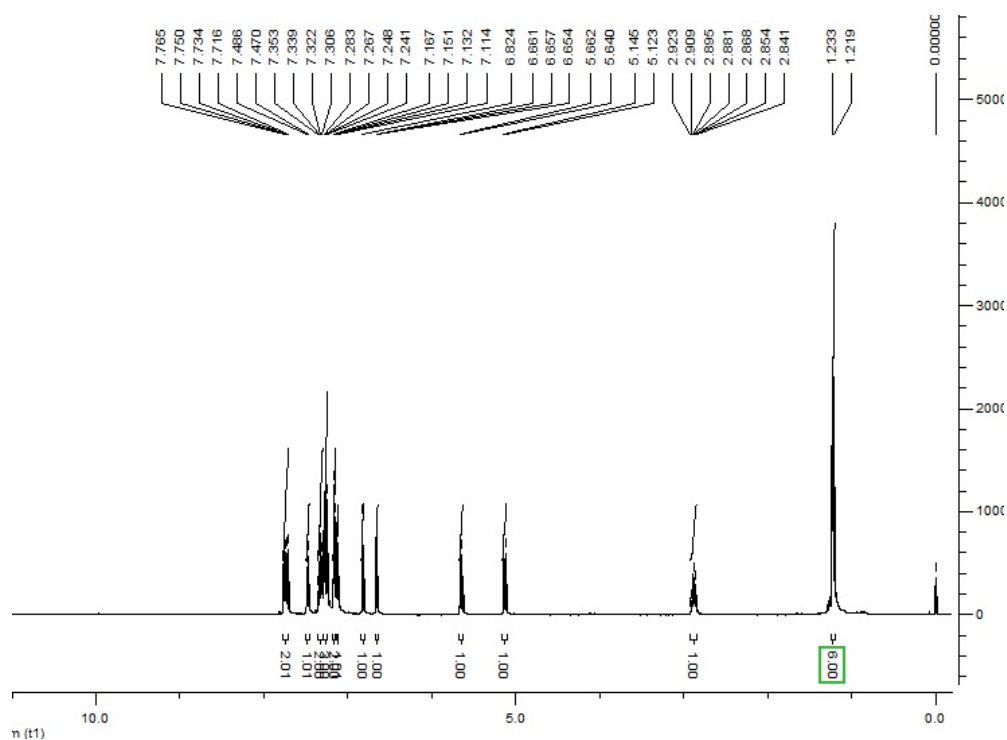

**Solvent: CDCl<sub>3</sub> – Frequency: 125 MHz**

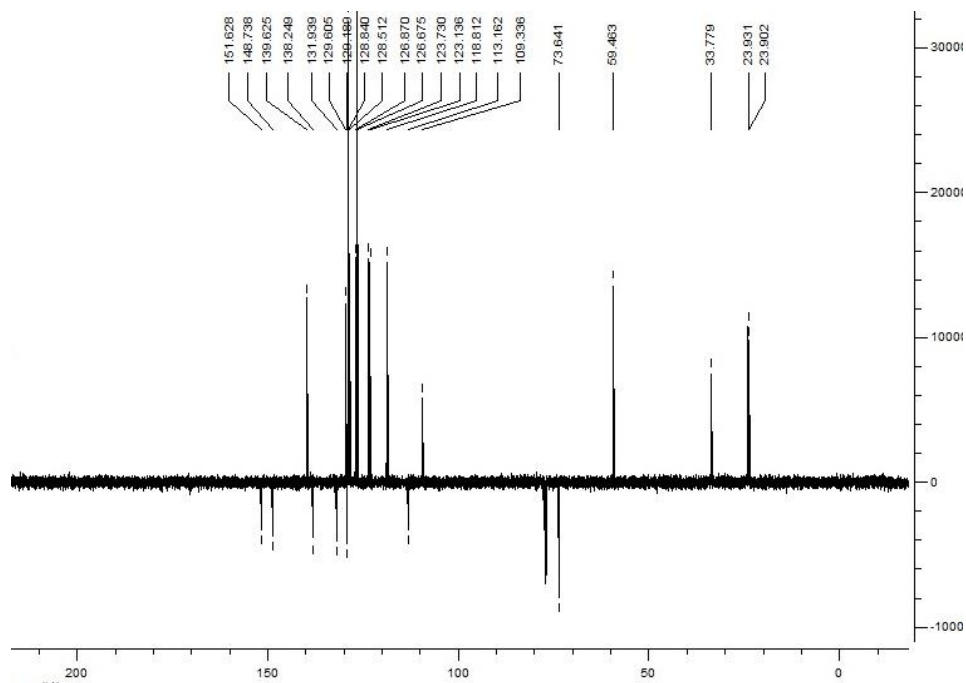

**Compound 2e:**

**Solvent: CDCl<sub>3</sub> – Frequency: 500 MHz**

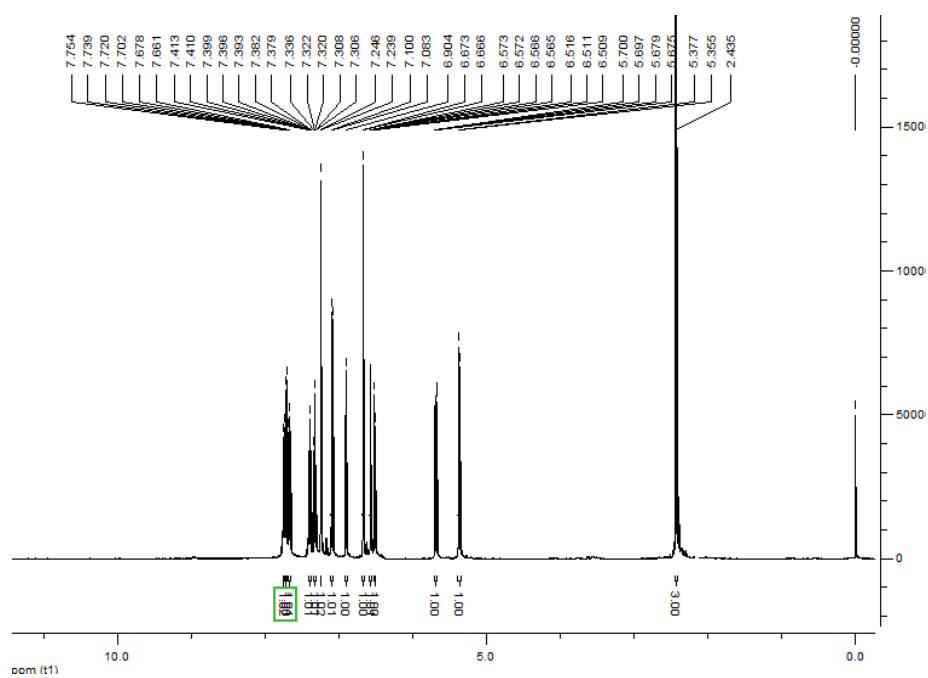

**Solvent: CDCl<sub>3</sub> – Frequency: 125 MHz**

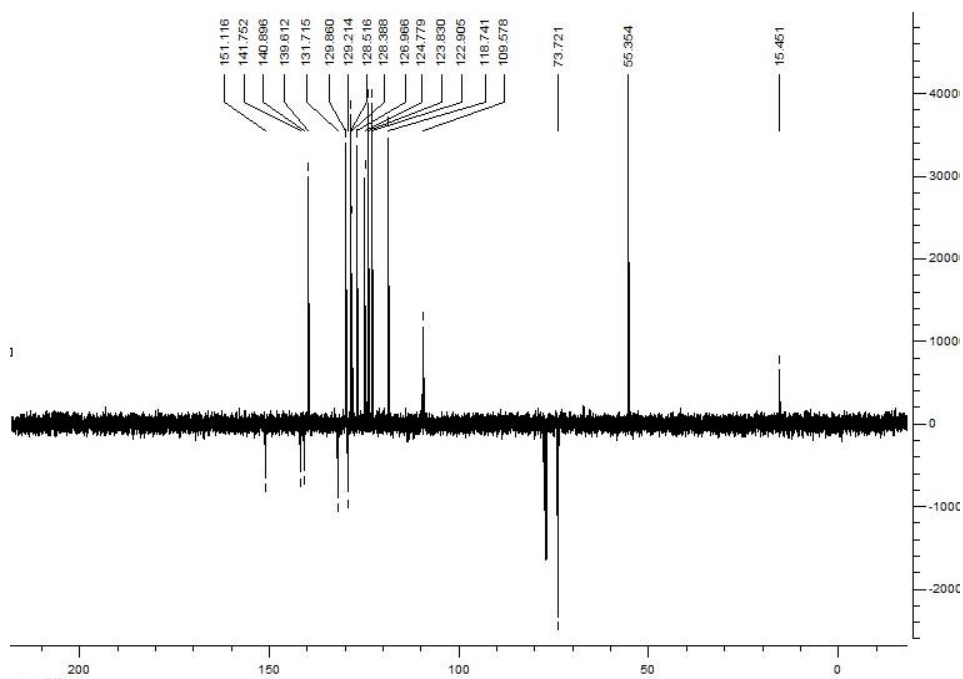

Supplement: f1 [file 9315614.f1.pdf]
